# Supplementary material for: Multifunctional magnetic graphene hybrid architectures: one-pot synthesis and their applications as organic pollutants adsorbents and supercapacitor electrodes
Source: Royal Society of Chemistry journal article supplement (doi:10.1039/c5ra11997a), 2015-01-01
Supplement: c5ra11997a1.pdf [file c5ra11997a1.pdf]

## Electronic Supporting Information

### Multifunctional magnetic graphene hybrid architectures: one-pot synthesis and their applications as organic pollutants adsorbent and supercapacitor electrode

Zheyang Zhang, Yue Dong, Fei Xiao\* and Shuai Wang\*

School of Chemistry & Chemical Engineering, Huazhong University of Science and  
Technology, Wuhan, 430074, P. R. China.

\*Corresponding authors. E-mail: chmsamuel@mail.hust.edu.cn; xiaofei@hust.edu.cn.

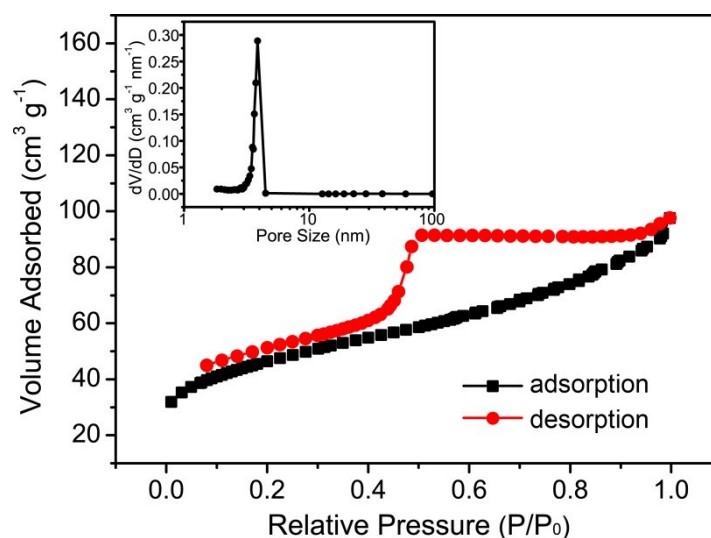

**Fig. S1** N<sub>2</sub> adsorption/desorption isotherms for GA. Inset is the pore size distribution diagram.

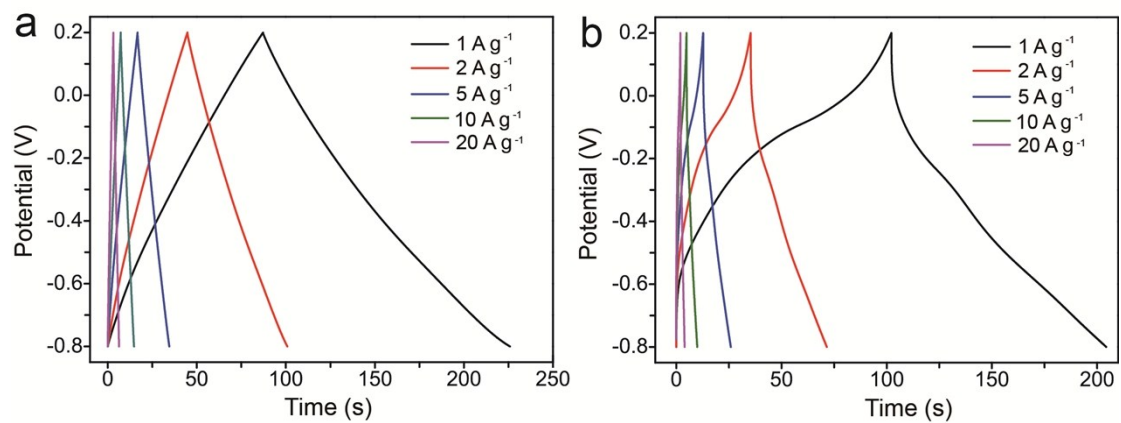

**Fig. S2** The galvanostatic charge/discharge curves of (a) GA electrode and (b) Fe<sub>3</sub>O<sub>4</sub> electrode at different current densities.
